# Supplementary material for: Implementing a multi-modal support service model for the family caregivers of persons with age-related macular degeneration: a study protocol for a randomised controlled trial
Source: PubMed Central journal article supplement — BMJ Open. 2017 Aug 4;7(8):e018204. doi: 10.1136/bmjopen-2017-018204 (PMC5724127; doi:10.1136/bmjopen-2017-018204), 2017-08-04
Supplement: bmjopen-2017-018204.reviewer_comments.pdf [file bmjopen-2017-018204.reviewer_comments.pdf]

## PEER REVIEW HISTORY

BMJ Open publishes all reviews undertaken for accepted manuscripts. Reviewers are asked to complete a checklist review form (<http://bmjopen.bmj.com/site/about/resources/checklist.pdf>) and are provided with free text boxes to elaborate on their assessment. These free text comments are reproduced below.

## ARTICLE DETAILS

|                            |                                                                                                                                                                                              |
|----------------------------|----------------------------------------------------------------------------------------------------------------------------------------------------------------------------------------------|
| <b>TITLE (PROVISIONAL)</b> | Implementing a multi-modal support service model for the family caregivers of persons with age-related macular degeneration: a study protocol for a randomised control trial.                |
| <b>AUTHORS</b>             | Gopinath, Bamini; Craig, Ashley; Kifley, Annette; Liew, Gerald; Bloffwitch, Jaye; Vu, Kim Van; Joachim, Nichole; Cummins, R; Heraghty, Julie; Broadh, Timothy; Hayes, Alison; Mitchell, Paul |

This article was not externally reviewed at BMJ Open. Protocols that have been independently assessed prior to submission to BMJ Open are usually fast-tracked to publication on the grounds that further substantial changes will not be possible. This independent assessment will usually be external, independent review for both a substantial grant award from a non-commercial or government funder and ethics approval.
